# Supplementary material for: Platelet-rich plasma in Achilles tendon healing 2 (PATH-2) trial: statistical analysis plan for a multicentre, double-blinded, parallel-group, placebo-controlled randomised clinical trial
Source: Springer Nature journal article supplement (doi:10.1186/s13063-018-2840-z), 2018-08-29
Supplement: MOESM1 [file 16082534]

**Table S1.** Baseline characteristics of participants according to intervention groups.

| Baseline characteristics    | PRP injection |      |      | Imitation |      |      | Total |      |      |
|-----------------------------|---------------|------|------|-----------|------|------|-------|------|------|
|                             | n             | Mean | SD   | n         | Mean | SD   | n     | Mean | SD   |
| Height (m)                  | XXX           | X.XX | X.XX | XXX       | X.XX | X.XX | XXX   | X.XX | X.XX |
| Weight (kg)                 | XXX           | XX.X | X.XX | XXX       | XX.X | X.XX | XXX   | XX.X | X.XX |
| BMI (kg/m <sup>2</sup> )    | XXX           | XX.X | X.XX | XXX       | XX.X | X.XX | XXX   | XX.X | X.XX |
| Age (years)                 | XXX           | XX.X | X.XX | XXX       | XX.X | X.XX | XXX   | XX.X | X.XX |
| Alcohol consumption (units) | XXX           | XX.X | X.XX | XXX       | XX.X | X.XX | XXX   | XX.X | X.XX |
| Days since injury           | XXX           | X.X  | X.XX | XXX       | X.X  | X.XX | XXX   | X.X  | X.XX |

**Table S2.** Stratification factors and socio-demographic characteristics of participants according to intervention groups.

| Stratification factor                | PRP injection |    | Imitation |    | Total |    |
|--------------------------------------|---------------|----|-----------|----|-------|----|
|                                      | n             | %  | n         | %  | n     | %  |
| Centre                               |               |    |           |    |       |    |
| John Radcliffe Hospital, Oxford      | XXX           | XX | XXX       | XX | XXX   | XX |
| Musgrove Park Hospital, Taunton      | XXX           | XX | XXX       | XX | XXX   | XX |
| Southmead Hospital, Bristol          | XXX           | XX | XXX       | XX | XXX   | XX |
| Llandough Hospital, Cardiff          | XXX           | XX | XXX       | XX | XXX   | XX |
| Royal London Hospital                | XXX           | XX | XXX       | XX | XXX   | XX |
| Leicester Royal Infirmary            | XXX           | XX | XXX       | XX | XXX   | XX |
| University Hospital Coventry         | XXX           | XX | XXX       | XX | XXX   | XX |
| Warrington Hospital                  | XXX           | XX | XXX       | XX | XXX   | XX |
| Basildon University Hospital         | XXX           | XX | XXX       | XX | XXX   | XX |
| Royal Liverpool Hospital             | XXX           | XX | XXX       | XX | XXX   | XX |
| Peterborough City Hospital           | XXX           | XX | XXX       | XX | XXX   | XX |
| Morrison Hospital, Swansea           | XXX           | XX | XXX       | XX | XXX   | XX |
| University Hospital Aintree          | XXX           | XX | XXX       | XX | XXX   | XX |
| Wythenshawe Hospital, Manchester     | XXX           | XX | XXX       | XX | XXX   | XX |
| Northern General Hospital, Sheffield | XXX           | XX | XXX       | XX | XXX   | XX |
| Royal Devon & Exeter Hospital        | XXX           | XX | XXX       | XX | XXX   | XX |
| Royal Surrey Hospital, Guildford     | XXX           | XX | XXX       | XX | XXX   | XX |
| Leighton Hospital, Crewe             | XXX           | XX | XXX       | XX | XXX   | XX |
| Age (years)                          |               |    |           |    |       |    |
| < 55                                 | XXX           | XX | XXX       | XX | XXX   | XX |
| ≥ 55                                 | XXX           | XX | XXX       | XX | XXX   | XX |
| Gender                               |               |    |           |    |       |    |
| Female                               | XXX           | XX | XXX       | XX | XXX   | XX |
| Male                                 | XXX           | XX | XXX       | XX | XXX   | XX |
| Lower limb injured                   |               |    |           |    |       |    |
| Right                                | XXX           | XX | XXX       | XX | XXX   | XX |
| Left                                 | XXX           | XX | XXX       | XX | XXX   | XX |
| Body mass index (kg/m <sup>2</sup> ) |               |    |           |    |       |    |
| Underweight (< 18.5)                 | XXX           | XX | XXX       | XX | XXX   | XX |
| Normal weight (18.5–24.99)           | XXX           | XX | XXX       | XX | XXX   | XX |
| Overweight (25–29.99)                | XXX           | XX | XXX       | XX | XXX   | XX |
| Obese (≥ 30)                         | XXX           | XX | XXX       | XX | XXX   | XX |
| Smoking status                       |               |    |           |    |       |    |
| Never smoked                         | XXX           | XX | XXX       | XX | XXX   | XX |
| Ex-smoker                            | XXX           | XX | XXX       | XX | XXX   | XX |
| Smoker                               | XXX           | XX | XXX       | XX | XXX   | XX |

**Table S3.** Baseline patient reported outcomes (PROMs) by intervention groups.

| Patient reported outcome measures    | PRP injection |      |      | Imitation |      |      | Total |      |      |
|--------------------------------------|---------------|------|------|-----------|------|------|-------|------|------|
|                                      | n             | Mean | SD   | n         | Mean | SD   | n     | Mean | SD   |
| Pain VAS score (0-100)               | XX            | X.XX | X.XX | XX        | X.XX | X.XX | XX    | X.XX | X.XX |
| PSFS (0-10)                          | XX            | X.XX | X.XX | XX        | X.XX | X.XX | XX    | X.XX | X.XX |
| ATR (0-100)                          | XX            | X.XX | X.XX | XX        | X.XX | X.XX | XX    | X.XX | X.XX |
| Pain score from ATRS (0-10)          | XX            | X.XX | X.XX | XX        | X.XX | X.XX | XX    | X.XX | X.XX |
| SF-12 (physical score before injury) | XX            | X.XX | X.XX | XX        | X.XX | X.XX | XX    | X.XX | X.XX |
| SF-12 (mental score before injury)   | XX            | X.XX | X.XX | XX        | X.XX | X.XX | XX    | X.XX | X.XX |
| SF-12 (physical score baseline)      | XX            | X.XX | X.XX | XX        | X.XX | X.XX | XX    | X.XX | X.XX |
| SF-12 (mental score baseline)        | XX            | X.XX | X.XX | XX        | X.XX | X.XX | XX    | X.XX | X.XX |

**Table S4.** Academic/employment related characteristics of participants according to intervention groups.

| Academic / employment status                | PRP Injection |    | Imitation |    | Total |    |
|---------------------------------------------|---------------|----|-----------|----|-------|----|
|                                             | n             | %  | n         | %  | n     | %  |
| Academic status                             |               |    |           |    |       |    |
| Full-time student                           | XXX           | XX | XXX       | XX | XXX   | XX |
| Part-time student                           | XXX           | XX | XXX       | XX | XXX   | XX |
| Not studying                                | XXX           | XX | XXX       | XX | XXX   | XX |
| Employment status                           |               |    |           |    |       |    |
| More than 40 hours / week                   | XXX           | XX | XXX       | XX | XXX   | XX |
| 25-40 hours / week                          | XXX           | XX | XXX       | XX | XXX   | XX |
| 10-25 hours / week                          | XXX           | XX | XXX       | XX | XXX   | XX |
| Less than 10 hours / week                   | XXX           | XX | XXX       | XX | XXX   | XX |
| Unemployed, looking for work                | XXX           | XX | XXX       | XX | XXX   | XX |
| At home / not looking for paid employment   | XXX           | XX | XXX       | XX | XXX   | XX |
| Unable to work due to illness or disability | XXX           | XX | XXX       | XX | XXX   | XX |
| Fully retired (no paid work)                | XXX           | XX | XXX       | XX | XXX   | XX |
| Type of work                                |               |    |           |    |       |    |
| Office based                                | XXX           | XX | XXX       | XX | XXX   | XX |
| Shop work (or similar)                      | XXX           | XX | XXX       | XX | XXX   | XX |
| Classroom (or equivalent)                   | XXX           | XX | XXX       | XX | XXX   | XX |
| Physical outside work                       | XXX           | XX | XXX       | XX | XXX   | XX |
| Physical indoor work                        | XXX           | XX | XXX       | XX | XXX   | XX |
| Mainly traveling/on the road                | XXX           | XX | XXX       | XX | XXX   | XX |
| Other 1                                     | XXX           | XX | XXX       | XX | XXX   | XX |
| Other 2                                     | XXX           | XX | XXX       | XX | XXX   | XX |
| etc.                                        | XXX           | XX | XXX       | XX | XXX   | XX |
| Time spent on feet                          |               |    |           |    |       |    |
| Most of the day                             | XXX           | XX | XXX       | XX | XXX   | XX |
| More than 4 hours / day                     | XXX           | XX | XXX       | XX | XXX   | XX |
| Less than 4 hours / day                     | XXX           | XX | XXX       | XX | XXX   | XX |
| Not much time (mostly sitting)              | XXX           | XX | XXX       | XX | XXX   | XX |
| Time spent driving                          |               |    |           |    |       |    |
| Most of the day                             | XXX           | XX | XXX       | XX | XXX   | XX |
| More than 4 hours / day                     | XXX           | XX | XXX       | XX | XXX   | XX |
| Less than 4 hours / day                     | XXX           | XX | XXX       | XX | XXX   | XX |
| Just to/from work                           | XXX           | XX | XXX       | XX | XXX   | XX |
| Do not drive                                | XXX           | XX | XXX       | XX | XXX   | XX |

**Table S5.** Physical activity of participants before injury according to intervention groups.

| Physical activity                                                   | PRP injection |    | Imitation |    | Total |    |
|---------------------------------------------------------------------|---------------|----|-----------|----|-------|----|
|                                                                     | n             | %  | n         | %  | n     | %  |
| Fitness (Cycling, jogging/running, weight-training, aerobics, etc.) |               |    |           |    |       |    |
| More than once / week                                               | XXX           | XX | XXX       | XX | XXX   | XX |
| Less than once / week                                               | XXX           | XX | XXX       | XX | XXX   | XX |
| Never                                                               | XXX           | XX | XXX       | XX | XXX   | XX |
| Cycling                                                             |               |    |           |    |       |    |
| More than once / week                                               | XXX           | XX | XXX       | XX | XXX   | XX |
| Less than once / week                                               | XXX           | XX | XXX       | XX | XXX   | XX |
| Never                                                               | XXX           | XX | XXX       | XX | XXX   | XX |
| Jogging/running                                                     |               |    |           |    |       |    |
| More than once / week                                               | XXX           | XX | XXX       | XX | XXX   | XX |
| Less than once / week                                               | XXX           | XX | XXX       | XX | XXX   | XX |
| Never                                                               | XXX           | XX | XXX       | XX | XXX   | XX |
| Walking                                                             |               |    |           |    |       |    |
| More than once / week                                               | XXX           | XX | XXX       | XX | XXX   | XX |
| Less than once / week                                               | XXX           | XX | XXX       | XX | XXX   | XX |
| Never                                                               | XXX           | XX | XXX       | XX | XXX   | XX |
| Weight-training                                                     |               |    |           |    |       |    |
| More than once / week                                               | XXX           | XX | XXX       | XX | XXX   | XX |
| Less than once / week                                               | XXX           | XX | XXX       | XX | XXX   | XX |
| Never                                                               | XXX           | XX | XXX       | XX | XXX   | XX |
| Aerobics/keep-fit                                                   |               |    |           |    |       |    |
| More than once / week                                               | XXX           | XX | XXX       | XX | XXX   | XX |
| Less than once / week                                               | XXX           | XX | XXX       | XX | XXX   | XX |
| Never                                                               | XXX           | XX | XXX       | XX | XXX   | XX |
| Athletics                                                           |               |    |           |    |       |    |
| More than once / week                                               | XXX           | XX | XXX       | XX | XXX   | XX |
| Less than once / week                                               | XXX           | XX | XXX       | XX | XXX   | XX |
| Never                                                               | XXX           | XX | XXX       | XX | XXX   | XX |
| Ball sports (Football, rugby, hockey, netball)                      |               |    |           |    |       |    |
| More than once / week                                               | XXX           | XX | XXX       | XX | XXX   | XX |
| Less than once / week                                               | XXX           | XX | XXX       | XX | XXX   | XX |
| Never                                                               | XXX           | XX | XXX       | XX | XXX   | XX |
| Football                                                            |               |    |           |    |       |    |
| More than once / week                                               | XXX           | XX | XXX       | XX | XXX   | XX |
| Less than once / week                                               | XXX           | XX | XXX       | XX | XXX   | XX |
| Never                                                               | XXX           | XX | XXX       | XX | XXX   | XX |
| Rugby                                                               |               |    |           |    |       |    |
| More than once / week                                               | XXX           | XX | XXX       | XX | XXX   | XX |
| Less than once / week                                               | XXX           | XX | XXX       | XX | XXX   | XX |
| Never                                                               | XXX           | XX | XXX       | XX | XXX   | XX |
| Hockey                                                              |               |    |           |    |       |    |
| More than once / week                                               | XXX           | XX | XXX       | XX | XXX   | XX |
| Less than once / week                                               | XXX           | XX | XXX       | XX | XXX   | XX |
| Never                                                               | XXX           | XX | XXX       | XX | XXX   | XX |
| Netball                                                             |               |    |           |    |       |    |
| More than once / week                                               | XXX           | XX | XXX       | XX | XXX   | XX |
| Less than once / week                                               | XXX           | XX | XXX       | XX | XXX   | XX |
| Never                                                               | XXX           | XX | XXX       | XX | XXX   | XX |

**Table S5.** Cont.

| Physical Activity                                             | PRP injection |    | Imitation |    | Total |    |
|---------------------------------------------------------------|---------------|----|-----------|----|-------|----|
|                                                               | n             | %  | n         | %  | n     | %  |
| Tennis                                                        |               |    |           |    |       |    |
| More than once / week                                         | XXX           | XX | XXX       | XX | XXX   | XX |
| Less than once / week                                         | XXX           | XX | XXX       | XX | XXX   | XX |
| Never                                                         | XXX           | XX | XXX       | XX | XXX   | XX |
| Squash                                                        |               |    |           |    |       |    |
| More than once / week                                         | XXX           | XX | XXX       | XX | XXX   | XX |
| Less than once / week                                         | XXX           | XX | XXX       | XX | XXX   | XX |
| Never                                                         | XXX           | XX | XXX       | XX | XXX   | XX |
| Badminton                                                     |               |    |           |    |       |    |
| More than once / week                                         | XXX           | XX | XXX       | XX | XXX   | XX |
| Less than once / week                                         | XXX           | XX | XXX       | XX | XXX   | XX |
| Never                                                         | XXX           | XX | XXX       | XX | XXX   | XX |
| Non-sporting activity (Heavy DIY, housework, gardening, etc.) |               |    |           |    |       |    |
| More than once / week                                         | XXX           | XX | XXX       | XX | XXX   | XX |
| Less than once / week                                         | XXX           | XX | XXX       | XX | XXX   | XX |
| Never                                                         | XXX           | XX | XXX       | XX | XXX   | XX |
| Heavy DIY, housework, gardening                               |               |    |           |    |       |    |
| More than once / week                                         | XXX           | XX | XXX       | XX | XXX   | XX |
| Less than once / week                                         | XXX           | XX | XXX       | XX | XXX   | XX |
| Never                                                         | XXX           | XX | XXX       | XX | XXX   | XX |
| Others (1, 2, 3, etc...)                                      |               |    |           |    |       |    |
| More than once / week                                         | XXX           | XX | XXX       | XX | XXX   | XX |
| Less than once / week                                         | XXX           | XX | XXX       | XX | XXX   | XX |
| Never                                                         | XXX           | XX | XXX       | XX | XXX   | XX |

**Table S6.** Injury related characteristics of participants by intervention groups.

| Injury characteristics                         | PRP injection |    | Imitation |    | Total |    |
|------------------------------------------------|---------------|----|-----------|----|-------|----|
|                                                | n             | %  | n         | %  | n     | %  |
| Mechanism of injury                            |               |    |           |    |       |    |
| During sports                                  | XXX           | XX | XXX       | XX | XXX   | XX |
| Heavy DIY, housework, gardening, etc.          | XXX           | XX | XXX       | XX | XXX   | XX |
| Other                                          | XXX           | XX | XXX       | XX | XXX   | XX |
| Activity during which sustained tendon rupture |               |    |           |    |       |    |
| Cycling                                        | XXX           | XX | XXX       | XX | XXX   | XX |
| Jogging/running                                | XXX           | XX | XXX       | XX | XXX   | XX |
| Walking                                        | XXX           | XX | XXX       | XX | XXX   | XX |
| Wight training                                 | XXX           | XX | XXX       | XX | XXX   | XX |
| Aerobics/keep fit                              | XXX           | XX | XXX       | XX | XXX   | XX |
| Athletics                                      | XXX           | XX | XXX       | XX | XXX   | XX |
| Football                                       | XXX           | XX | XXX       | XX | XXX   | XX |
| Rugby                                          | XXX           | XX | XXX       | XX | XXX   | XX |
| Hockey                                         | XXX           | XX | XXX       | XX | XXX   | XX |
| Netball                                        | XXX           | XX | XXX       | XX | XXX   | XX |
| Tennis                                         | XXX           | XX | XXX       | XX | XXX   | XX |
| Squash                                         | XXX           | XX | XXX       | XX | XXX   | XX |
| Badminton                                      | XXX           | XX | XXX       | XX | XXX   | XX |
| Heavy DIY, housework, gardening                | XXX           | XX | XXX       | XX | XXX   | XX |
| Others (1, 2, 3, etc...)                       | XXX           | XX | XXX       | XX | XXX   | XX |

**Table S7.** Clinical characteristics of participants by intervention groups.

| Clinical characteristics                                 | PRP injection |    | Imitation |    | Total |    |
|----------------------------------------------------------|---------------|----|-----------|----|-------|----|
|                                                          | n             | %  | n         | %  | n     | %  |
| Medical condition in addition to tendon rupture          |               |    |           |    |       |    |
| Heart disease                                            | XXX           | XX | XXX       | XX | XXX   | XX |
| Hypertension                                             | XXX           | XX | XXX       | XX | XXX   | XX |
| Asthma/COPD                                              | XXX           | XX | XXX       | XX | XXX   | XX |
| Parkinson's disease                                      | XXX           | XX | XXX       | XX | XXX   | XX |
| Epilepsy                                                 | XXX           | XX | XXX       | XX | XXX   | XX |
| Liver disease                                            | XXX           | XX | XXX       | XX | XXX   | XX |
| Stroke/Mini-stroke (TIA)                                 | XXX           | XX | XXX       | XX | XXX   | XX |
| Peptic ulcer                                             | XXX           | XX | XXX       | XX | XXX   | XX |
| Cancer                                                   | XXX           | XX | XXX       | XX | XXX   | XX |
| Deep Vein Thrombosis (DVT)/Pulmonary embolism (PE)       | XXX           | XX | XXX       | XX | XXX   | XX |
| Osteoarthritis                                           | XXX           | XX | XXX       | XX | XXX   | XX |
| Rheumatoid arthritis                                     | XXX           | XX | XXX       | XX | XXX   | XX |
| Others (1, 2, 3, etc...)                                 | XXX           | XX | XXX       | XX | XXX   | XX |
| Number of co-morbidities                                 |               |    |           |    |       |    |
| 1                                                        | XXX           | XX | XXX       | XX | XXX   | XX |
| 2                                                        | XXX           | XX | XXX       | XX | XXX   | XX |
| More than 2                                              | XXX           | XX | XXX       | XX | XXX   | XX |
| Taking medication for pain or inflammation before injury |               |    |           |    |       |    |
| No                                                       | XXX           | XX | XXX       | XX | XXX   | XX |
| Yes                                                      | XXX           | XX | XXX       | XX | XXX   | XX |

**Table S8.** Medications that may influence platelet function taken by participants by intervention groups.

| Medication that could influence platelet function | PRP injection |    | Imitation |    | Total |    |
|---------------------------------------------------|---------------|----|-----------|----|-------|----|
|                                                   | n             | %  | n         | %  | n     | %  |
| Yes                                               | XXX           | XX | XXX       | XX | XXX   | XX |
| No                                                | XXX           | XX | XXX       | XX | XXX   | XX |

**Table S9.** Complications reported by participants during the 24 weeks after injury and treatment.

|                                                                      | PRP injection |    | Imitation |    | Total |    |
|----------------------------------------------------------------------|---------------|----|-----------|----|-------|----|
|                                                                      | n             | %  | n         | %  | n     | %  |
| Serious Infection at injection site confirmed by laboratory analysis | XXX           | XX | XXX       | XX | XXX   | XX |
| Infection at injection site confirmed by doctor                      | XXX           | XX | XXX       | XX | XXX   | XX |
| Infection non-injection site                                         | XXX           | XX | XXX       | XX | XXX   | XX |
| Severe pain at injection site requiring more than simple pain relief | XXX           | XX | XXX       | XX | XXX   | XX |
| DVT in lower limb                                                    | XXX           | XX | XXX       | XX | XXX   | XX |
| Skin breakdown or ulceration in the treated leg                      | XXX           | XX | XXX       | XX | XXX   | XX |
| Re-rupture of the Achilles tendon treated in the study               | XXX           | XX | XXX       | XX | XXX   | XX |
| Surgery on the Achilles tendon treated in the study                  | XXX           | XX | XXX       | XX | XXX   | XX |
| Fainting due to blood sample collection                              | XXX           | XX | XXX       | XX | XXX   | XX |
| Fainting due to study intervention delivery                          | XXX           | XX | XXX       | XX | XXX   | XX |
| Frequent discomfort at injection site                                | XXX           | XX | XXX       | XX | XXX   | XX |
| Discomfort at injection site only during rehabilitation exercises    | XXX           | XX | XXX       | XX | XXX   | XX |
| Swelling of lower leg or foot                                        | XXX           | XX | XXX       | XX | XXX   | XX |
| Plaster sores                                                        | XXX           | XX | XXX       | XX | XXX   | XX |
| Technical complications with casting and splinting                   | XXX           | XX | XXX       | XX | XXX   | XX |
| Consequences of depending on walking aids                            | XXX           | XX | XXX       | XX | XXX   | XX |
| Other problem with cast, boot or splint                              | XXX           | XX | XXX       | XX | XXX   | XX |
| Other problem                                                        | XXX           | XX | XXX       | XX | XXX   | XX |
| Number of complications per participant                              |               |    |           |    |       |    |
| Zero                                                                 | XXX           | XX | XXX       | XX | XXX   | XX |
| One                                                                  | XXX           | XX | XXX       | XX | XXX   | XX |
| Etc.                                                                 | XXX           | XX | XXX       | XX | XXX   | XX |
| SAEs                                                                 |               |    |           |    |       |    |
| List here (...)                                                      | XXX           | XX | XXX       | XX | XXX   | XX |

Notes: DVT: Deep vein thrombosis. n: number of participants reporting this type of complication one or more times during the course of the study. The number of complication events is not given, due to re-reporting by participants.
